# Supplementary material
Source: PubMed Central journal article supplement (PMC6407040)
Supplement: am8b19094_si_001.pdf [file am8b19094_si_001.pdf]

## SUPPORTING INFORMATION

### A pH-triggered, self-assembled and bioprintable hybrid hydrogel scaffold for mesenchymal stem cell-based bone tissue engineering

Chen Zhao<sup>1,2#</sup>, Nader Taheri Qazvini<sup>3#</sup>, Monirosadat Sadati<sup>3,4</sup>, Zongyue Zeng<sup>2,5</sup>, Shifeng Huang<sup>1,2</sup>, Ana Losada De La Lastra<sup>6</sup>, Linghuan Zhang<sup>2,5</sup>, Yixiao Feng<sup>1,2</sup>, Wei Liu<sup>1,2</sup>, Bo Huang<sup>2,5,7</sup>, Bo Zhang<sup>2,8</sup>, Zhengyu Dai<sup>2,9</sup>, Yi Shen<sup>2,10</sup>, Xi Wang<sup>2,5</sup>, Wenping Luo<sup>2,5</sup>, Bo Liu<sup>1,2</sup>, Yan Lei<sup>1,2</sup>, Zhenyu Ye<sup>2,11</sup>, Ling Zhao<sup>1,2</sup>, Daigui Cao<sup>2,5,12</sup>, Lijuan Yang<sup>2,8</sup>, Xian Chen<sup>2,13</sup>, Aravind Athiviraham<sup>2</sup>, Michael J. Lee<sup>2</sup>, Jennifer Moriatis Wolf<sup>2</sup>, Russell R. Reid<sup>2,14</sup>, Matthew Tirrell<sup>3,4</sup>, Wei Huang<sup>1\*</sup>, Juan J. de Pablo<sup>3,4\*</sup> and Tong-Chuan He<sup>2\*</sup>

<sup>1</sup> Departments of Orthopedic Surgery, Clinical Laboratory Medicine, Breast Surgery, Burn and Plastic Surgery, Otolaryngology-Head and Neck Surgery, and Obstetrics and Gynecology, the First Affiliated Hospital of Chongqing Medical University, Chongqing 400016, China; <sup>2</sup> Molecular Oncology Laboratory, Department of Orthopaedic Surgery and Rehabilitation Medicine, The University of Chicago Medical Center, Chicago, IL 60637, USA; <sup>3</sup> Institute for Molecular Engineering, The University of Chicago, Chicago, IL 60637, USA; <sup>4</sup> Argonne National Laboratory, Argonne, IL 60439, USA; <sup>5</sup> Ministry of Education Key Laboratory of Diagnostic Medicine and School of Laboratory Medicine, and the Affiliated Hospitals of Chongqing Medical University, Chongqing 400016, China; <sup>6</sup> Department of Chemistry, Imperial College London, London SW7 2AZ; <sup>7</sup> Department of Clinical Laboratory Medicine, the Second Affiliated Hospital of Nanchang University, Nanchang, 330031, China; <sup>8</sup> Key Laboratory of Orthopaedic Surgery of Gansu Province and the Department of Orthopaedic Surgery, the Second Hospital of Lanzhou University, Lanzhou, 730030, China; <sup>9</sup> Department of Orthopaedic Surgery, Chongqing Hospital of Traditional Chinese Medicine, Chongqing 400021, China; <sup>10</sup> Department of Orthopaedic Surgery, Xiangya Second Hospital of Central South University, Changsha 410011, China; <sup>11</sup> Department of General Surgery, the Second Affiliated Hospital of Soochow University, Suzhou 215004, China; <sup>12</sup> Department of Orthopaedic Surgery, Chongqing General Hospital, Chongqing 400021, China; <sup>13</sup> Department of Clinical Laboratory Medicine, the Affiliated Hospital of Qingdao University, Qingdao 266061, China; <sup>14</sup> Department of Surgery, Laboratory of Craniofacial Biology and Development, Section of Plastic Surgery, The University of Chicago Medical Center, Chicago, IL 60637, USA; # Equal contributions; \* Corresponding authors

#### CORRESPONDENCES

T.-C. He, MD, PhD  
Molecular Oncology Laboratory  
The University of Chicago Medical Center  
5841 South Maryland Avenue, MC 3079  
Chicago, IL 60637, USA  
Tel. (773) 702-7169; Fax (773) 834-4598  
E-mail: [tche@uchicago.edu](mailto:tche@uchicago.edu)

Juan de Pablo, PhD  
Institute for Molecular Engineering  
The University of Chicago  
Chicago, IL 60637, USA  
E-mail: [depablo@uchicago.edu](mailto:depablo@uchicago.edu)

Wei Huang, MD, PhD  
Department of Orthopaedic Surgery  
The First Affiliated Hospital of Chongqing Medical University  
No.1 Yixueyuan Road, Yuzhong District  
Chongqing 400016, China  
Tel/Fax: (86)23- 89011212  
E-Mail: [huangwei68@263.net](mailto:huangwei68@263.net)

## CONTENTS

**Table S1.** List of TqPCR Primers

**Figure S1.** Rheological measurements of pH-induced self-assembly, shear-thinning behavior, and self-healing characteristics of CMCh-ACP hybrid hydrogels

**Figure S2.** Cytotoxicity and cell proliferation of the iMADs cells entrapped in CMCh-ACP hybrid gel.

**Figure S3.** Vascularization feature of the ectopic bone masses retrieved from the BMP9 + CMCh-ACP group

**Table S1. List of TqPCR Primers**

| Genes               | qPCR Primer Sequences |                       | Accession Number |
|---------------------|-----------------------|-----------------------|------------------|
|                     | Forward               | Reverse               |                  |
| mouse Runx2         | CCGGTCTCCTTCCAGGAT    | GGGAACTGCTGTGGCTTC    | NM_001146038     |
| mouse Ppar $\gamma$ | TTTTCAAGGGTGCCAGTTTC  | AATCCTTGGCCCTCTGAGAT  | NM_011146        |
| mouse Osx           | GAAGTCCAATGGGGATCTGA  | AGAATCCCTTTCCCTCTCCA  | NM_130458        |
| mouse Alp           | CCCCATGTGATGGCGTAT    | CGGTAGGGAGAGCACAGC    | NM_007431        |
| mouse Ocn           | CCTTCATGTCCAAGCAGGA   | GGCGGTCTTCAAGCCATAC   | NM_001032298     |
| mouse Opn           | CCTCCCGGTGAAAGTGAC    | CTGTGGCGCAAGGAGATT    | NM_001204203     |
| mouse Sox9          | GCAAGCAAAGGAGACCAAAA  | CGCTGGTATTTCAGGGAGGTA | NM_011448        |
| mouse Gapdh         | GCCTCGTCCCGTAGACAAAA  | TTCCATTCTCGGCCTTGAC   | NM_008084        |

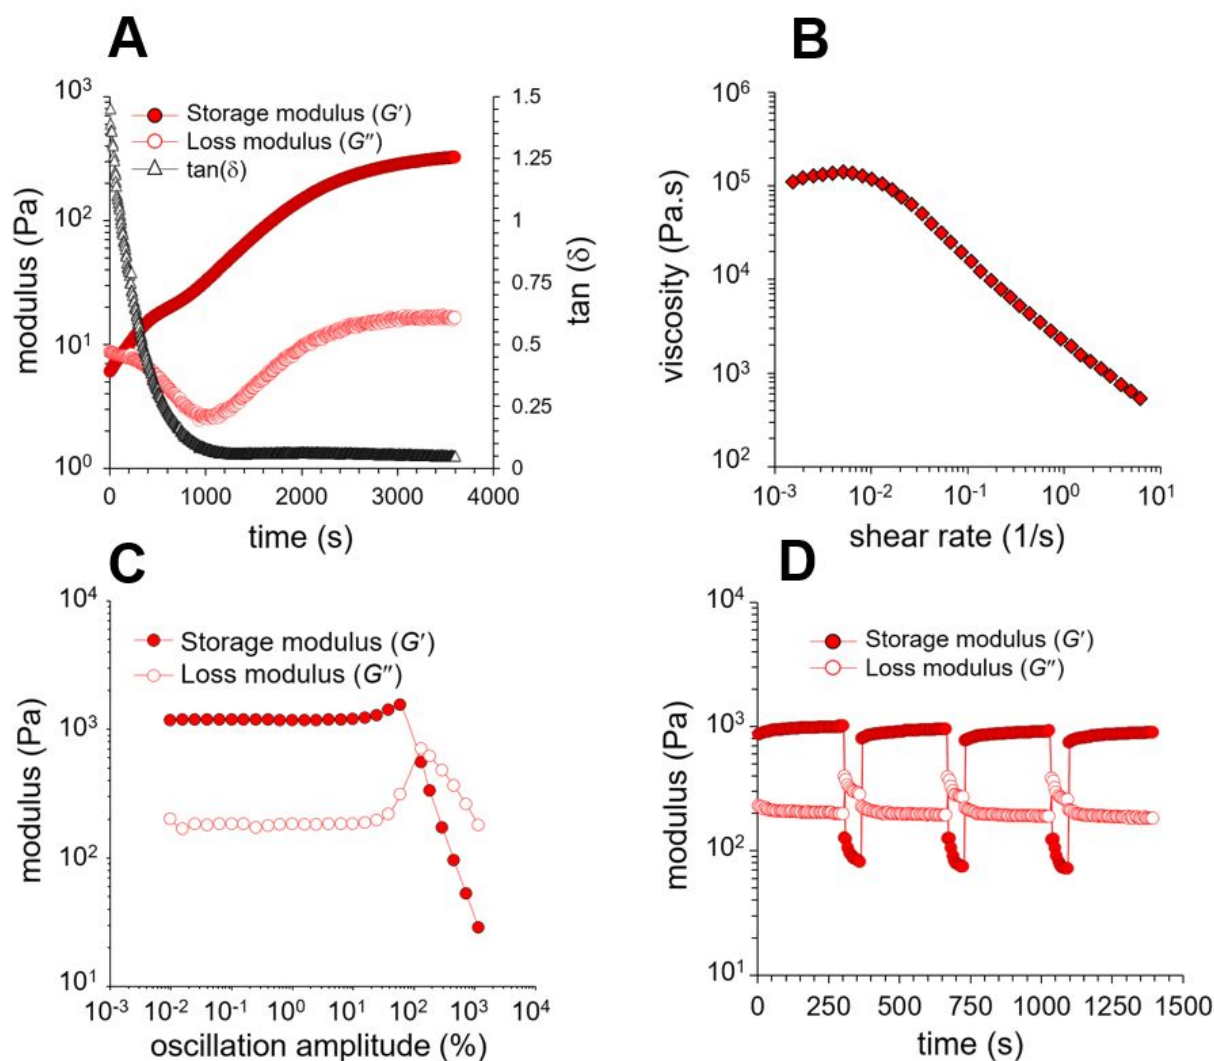

**Figure S1. Rheological measurements of pH-induced self-assembly, shear-thinning behavior, and self-healing characteristics of CMCh-ACP hybrid hydrogels.** (A) Evolution of storage ( $G'$ ) and loss ( $G''$ ) moduli and  $\tan(\delta)$  after addition of GDL to a 2.5 wt% dispersion of CMCh-ACP. (B) The change of viscosity of CMCh-ACP gel (10 wt%, pH 7.5) in shear rate sweep measurement. (C) The variation of  $G'$  and  $G''$  in oscillatory strain sweep measurements (10 wt%, pH 7.5). (D) Evolution of  $G'$  and  $G''$  as a function of time showing the structural recovery behavior of the CMCh-ACP gel (10 wt%, pH 7.5, strain 1%, 1 Hz) after multiple destruction cycles by a 1000% oscillatory shear strain for 1 min at 1 Hz.

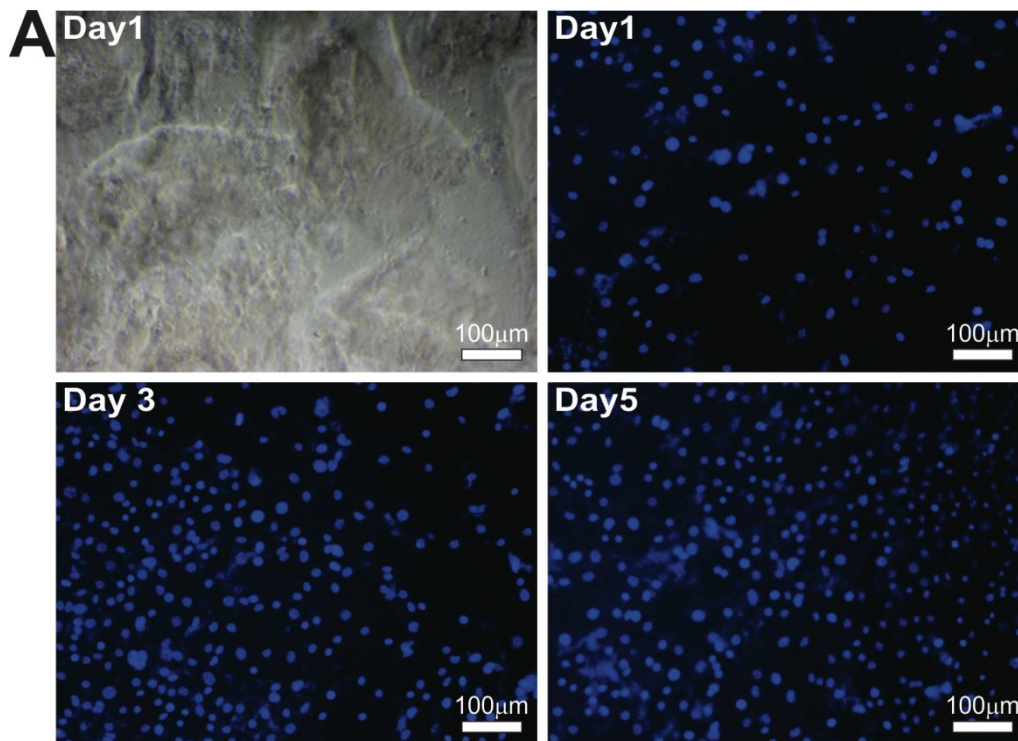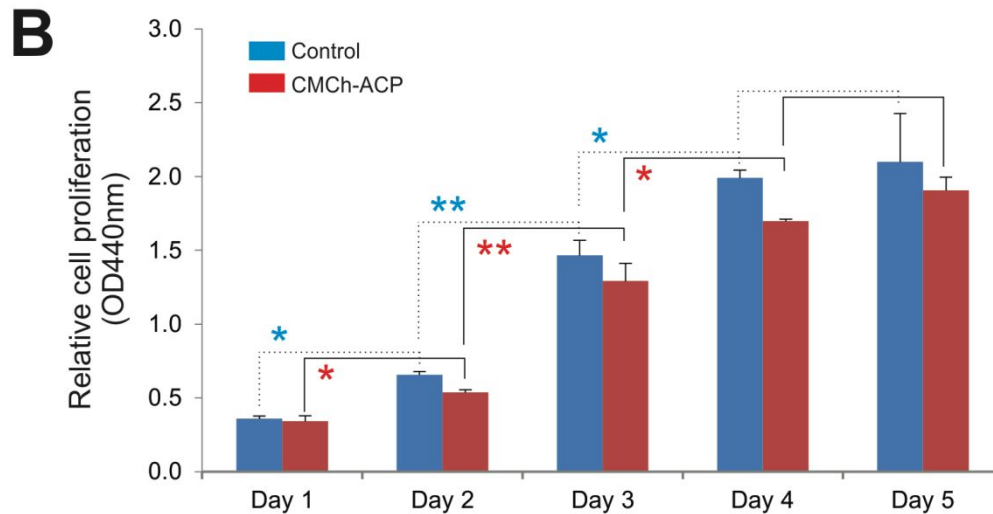

**Figure S2. Cytotoxicity and cell proliferation of the iMADs cells entrapped in CMCh-ACP hybrid gel.** (A) Hoechst staining assay. Exponentially growing iMADs cells were mixed with CMCh-ACP hybrid gel and seeded in 24-well plates. At the indicated time points, the culture medium in each well was removed, gently washed with PBS, fixed and stained with the Magic Solution containing Hoechst 33258. Apoptotic cells were examined and recorded under a fluorescence microscope. Each assay condition was done in triplicate. Representative results are shown. (B) WST-1 assay. Exponentially growing iMADs cells were mixed with CMCh-ACP hybrid gel (CMCh-ACP) or directly plated without the hybrid gel (Control) in 24-well plates. At 1, 2, 3, 4, and 5 days after plating, Premixed WST-1 Reagent was added to each well, followed by an incubation at 37°C for 60min and reading at 440nm using a microplate reader. Each assay condition was done in triplicate. The relative cell proliferation rates between control and CMCh-ACP groups were not statistically significant at the same time point, although the cell proliferation rates for either control or CMCh-ACP group were statistically significant from day 1 to day 4. “\*” p<0.05; “\*\*” p<0.01.

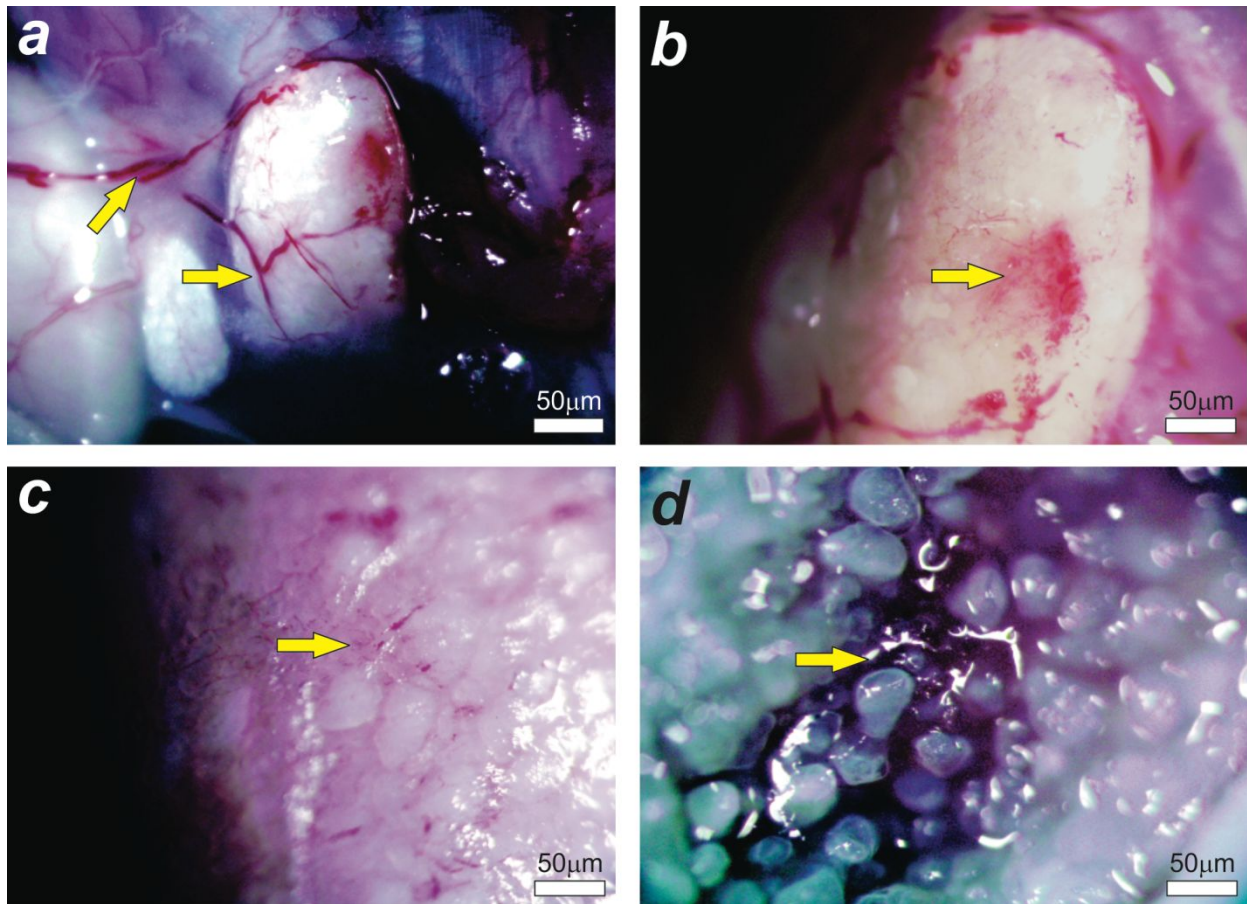

**Figure S3. Vascularization feature of the ectopic bone masses retrieved from the BMP9 + CMCh-ACP group (6-week time point).** Representative Gross images were taken by using the Olympus SZX16 stereomicroscope at lower (*a & b*) and higher (*c & d*) magnifications.
